# Supplementary material for: Nonlinear Hammett plots in pyridinolysis of 2,4-dinitrophenyl X-substituted benzoates: change in RDS versus resonance contribution
Source: Royal Society of Chemistry journal article supplement (doi:10.1039/c0ob00031k), 2010-01-01
Supplement: c0ob00031k.pdf [file c0ob00031k.pdf]

## Electronic supplementary information

### Nonlinear Hammett plots in pyridinolysis of 2,4-dinitrophenyl X-substituted benzoates: Change in rate-determining step versus resonance contribution

Ik-Hwan Um,<sup>\*</sup> Li-Ra Im, Eun-Hee Kim, and Ji Hye Shin

*Department of Chemistry and Nano Science, Ewha Womans University, Seoul 120-750, Korea.*

*e-mail: ihum@ewha.ac.kr Tel: 82-2-3277-2349. Fax: 82-2-3277-2844.*

#### Table of Contents

Figures S1-S10. Brønsted-type plots for reactions of 2,4-dinitrophenyl X-substituted benzoates (**1a-j**) with Z-substituted pyridines in 80 mol % H<sub>2</sub>O/20 mol % DMSO at 25.0 °C. -----2 – 6.

Tables S1- S10. Kinetic data for reactions of 2,4-dinitrophenyl X-substituted benzoates (**1a-j**) with 4-aminopyridine in 80 mol % H<sub>2</sub>O/20 mol % DMSO at 25.0 °C. -----7 - 10.

Tables S11- S20. Kinetic data for reactions of 2,4-dinitrophenyl X-substituted benzoates (**1a-j**) with 3,4-dimethylpyridine in 80 mol % H<sub>2</sub>O/20 mol % DMSO at 25.0 °C. -----10 - 13.

Tables S21- S30. Kinetic data for reactions of 2,4-dinitrophenyl X-substituted benzoates (**1a-j**) with pyridine in 80 mol % H<sub>2</sub>O/20 mol % DMSO at 25.0 °C. -----13 - 16.

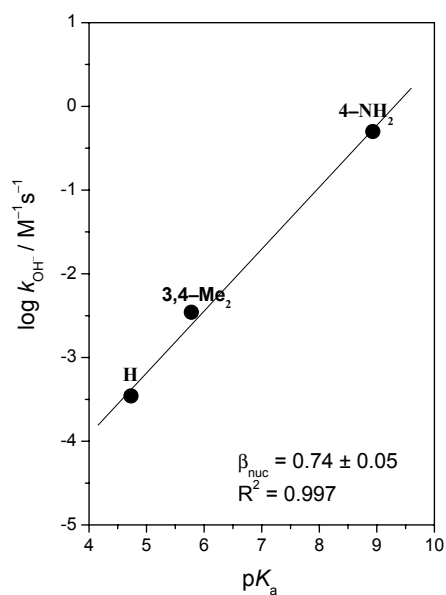

**Figure S1.** Brønsted-type plot for the reactions of 2,4-dinitrophenyl 4-dimethylaminobenzoate (**1a**) with Z-substituted pyridines (Z = H, 3,4-Me<sub>2</sub>, and 4-NH<sub>2</sub>) in 80 mol % H<sub>2</sub>O / 20 mol % DMSO at 25.0 ± 0.1 °C.

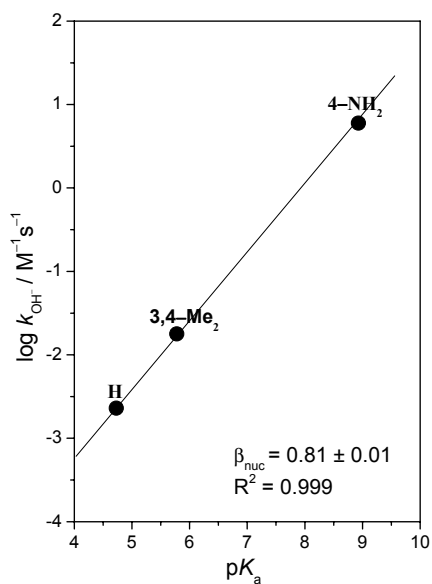

**Figure S2.** Brønsted-type plot for the reactions of 2,4-dinitrophenyl 4-methoxybenzoate (**1b**) with Z-substituted pyridines (Z = H, 3,4-Me<sub>2</sub>, and 4-NH<sub>2</sub>) in 80 mol % H<sub>2</sub>O / 20 mol % DMSO at 25.0 ± 0.1 °C.

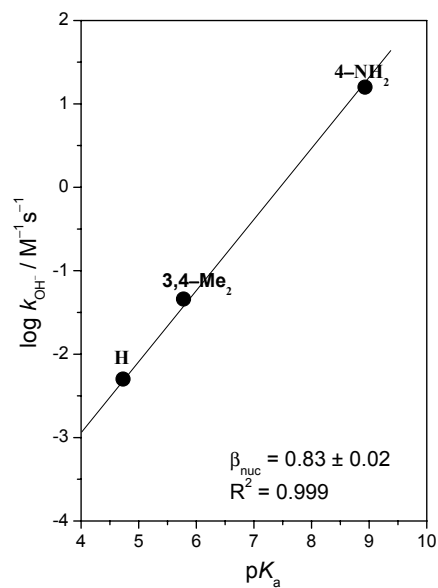

**Figure S3.** Brønsted-type plot for the reactions of 2,4-dinitrophenyl 4-methylbenzoate (**1c**) with Z-substituted pyridines (Z = H, 3,4-Me<sub>2</sub>, and 4-NH<sub>2</sub>) in 80 mol % H<sub>2</sub>O / 20 mol % DMSO at 25.0 ± 0.1 °C.

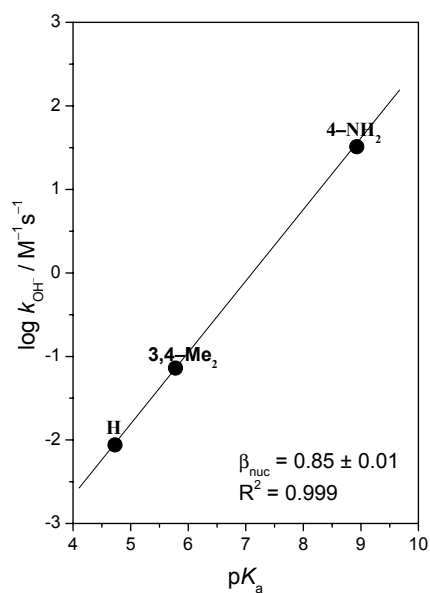

**Figure S4.** Brønsted-type plot for the reactions of 2,4-dinitrophenyl benzoate (**1d**) with Z-substituted pyridines (Z = H, 3,4-Me<sub>2</sub>, and 4-NH<sub>2</sub>) in 80 mol % H<sub>2</sub>O / 20 mol % DMSO at 25.0 ± 0.1 °C.

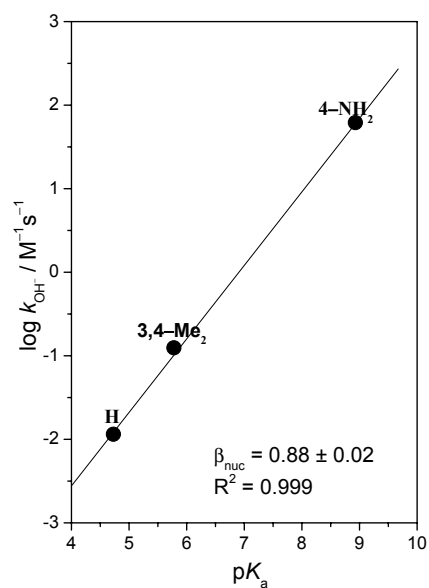

**Figure S5.** Brønsted-type plot for the reactions of 2,4-dinitrophenyl 4-chlorobenzoate (**1e**) with Z-substituted pyridines (Z = H, 3,4-Me<sub>2</sub>, and 4-NH<sub>2</sub>) in 80 mol % H<sub>2</sub>O / 20 mol % DMSO at 25.0 ± 0.1 °C.

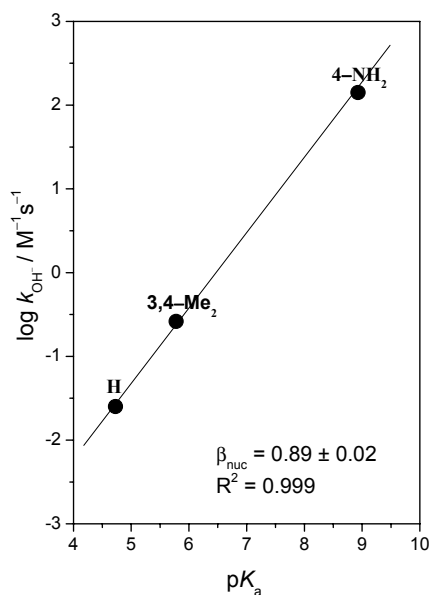

**Figure S6.** Brønsted-type plot for the reactions of 2,4-dinitrophenyl 3-chlorobenzoate (**1f**) with Z-substituted pyridines (Z = H, 3,4-Me<sub>2</sub>, and 4-NH<sub>2</sub>) in 80 mol % H<sub>2</sub>O / 20 mol % DMSO at 25.0 ± 0.1 °C.

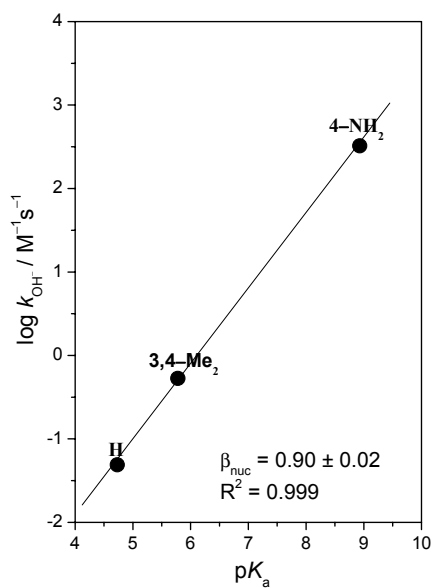

**Figure S7.** Brønsted-type plot for the reactions of 2,4-dinitrophenyl 4-cyanobenzoate (**1g**) with Z-substituted pyridines (Z = H, 3,4-Me<sub>2</sub>, and 4-NH<sub>2</sub>) in 80 mol % H<sub>2</sub>O / 20 mol % DMSO at 25.0 ± 0.1 °C.

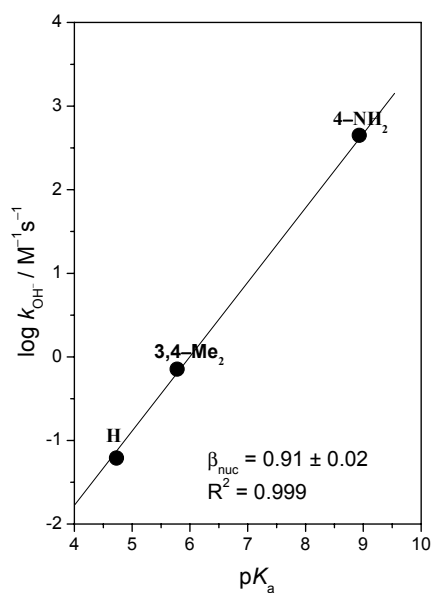

**Figure S8.** Brønsted-type plot for the reactions of 2,4-dinitrophenyl 4-nitrobenzoate (**1h**) with Z-substituted pyridines (Z = H, 3,4-Me<sub>2</sub>, and 4-NH<sub>2</sub>) in 80 mol % H<sub>2</sub>O / 20 mol % DMSO at 25.0 ± 0.1 °C.

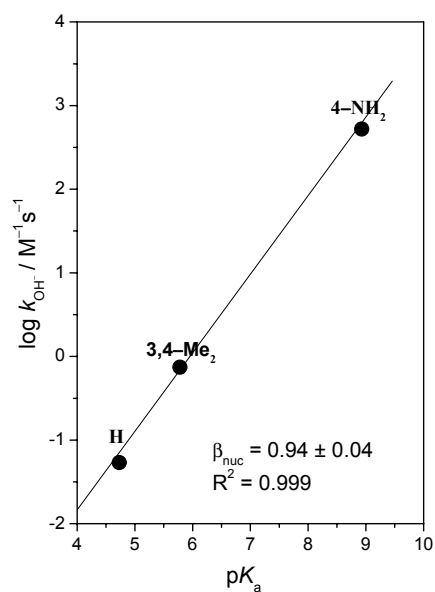

**Figure S9.** Brønsted-type plot for the reactions of 2,4-dinitrophenyl 4-chloro-3-nitrobenzoate (**1i**) with Z-substituted pyridines (Z = H, 3,4-Me<sub>2</sub>, and 4-NH<sub>2</sub>) in 80 mol % H<sub>2</sub>O / 20 mol % DMSO at 25.0 ± 0.1 °C.

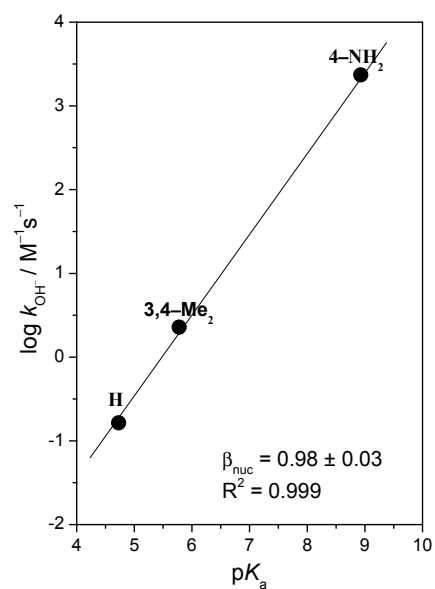

**Figure S10.** Brønsted-type plot for the reactions of 2,4-dinitrophenyl 3,5-dinitrobenzoate (**1j**) with Z-substituted pyridines (Z = H, 3,4-Me<sub>2</sub>, and 4-NH<sub>2</sub>) in 80 mol % H<sub>2</sub>O / 20 mol % DMSO at 25.0 ± 0.1 °C.

**Table S1.** Kinetic data for reaction of 2,4-dinitrophenyl 4-dimethylaminobenzoate (**1a**) with 4-aminopyridine in 80 mol % H<sub>2</sub>O/20 mol % DMSO at 25.0 ± 0.1 °C.

| $10^3$ [4-aminopyridine] / M | $10^3 k_{\text{obsd}} / \text{s}^{-1}$ |
|------------------------------|----------------------------------------|
| 18.8                         | 9.54                                   |
| 34.5                         | 17.0                                   |
| 47.8                         | 23.4                                   |
| 59.1                         | 29.6                                   |
| 69.0                         | 34.5                                   |

$$k_{\text{OH}^-} = 0.499 \pm 0.008 \text{ M}^{-1}\text{s}^{-1}$$
$$R^2 = 0.9996$$

**Table S2.** Kinetic data for reaction of 2,4-dinitrophenyl 4-methoxybenzoate (**1b**) with 4-aminopyridine in 80 mol % H<sub>2</sub>O/20 mol % DMSO at 25.0 ± 0.1 °C.

| $10^3$ [4-aminopyridine] / M | $10^3 k_{\text{obsd}} / \text{s}^{-1}$ |
|------------------------------|----------------------------------------|
| 4.04                         | 24.0                                   |
| 7.92                         | 46.5                                   |
| 11.7                         | 69.7                                   |
| 15.3                         | 91.5                                   |
| 18.7                         | 111                                    |

$$k_{\text{OH}^-} = 5.97 \pm 0.04 \text{ M}^{-1}\text{s}^{-1}$$
$$R^2 = 0.9999$$

**Table S3.** Kinetic data for reaction of 2,4-dinitrophenyl 4-methylbenzoate (**1c**) with 4-aminopyridine in 80 mol % H<sub>2</sub>O/20 mol % DMSO at 25.0 ± 0.1 °C.

| $10^3$ [4-aminopyridine] / M | $10^3 k_{\text{obsd}} / \text{s}^{-1}$ |
|------------------------------|----------------------------------------|
| 1.63                         | 24.2                                   |
| 3.24                         | 49.7                                   |
| 4.83                         | 75.1                                   |
| 6.39                         | 100                                    |
| 7.92                         | 123                                    |

$$k_{\text{OH}^-} = 15.8 \pm 0.10 \text{ M}^{-1}\text{s}^{-1}$$
$$R^2 = 0.9999$$

**Table S4.** Kinetic data for reaction of 2,4-dinitrophenyl benzoate ( **1d** ) with 4-aminopyridine in 80 mol % H<sub>2</sub>O/20 mol % DMSO at 25.0 ± 0.1 °C.

| $10^4$ [4-aminopyridine] / M | $10^2 k_{\text{obsd}} / \text{s}^{-1}$ |
|------------------------------|----------------------------------------|
| 11.9                         | 3.65                                   |
| 15.8                         | 5.09                                   |
| 19.7                         | 6.29                                   |
| 23.6                         | 7.28                                   |
| 27.5                         | 9.14                                   |
| 31.4                         | 9.75                                   |

$$k_{\text{OH}^-} = 32.0 \pm 1.63 \text{ M}^{-1}\text{s}^{-1}$$
$$R^2 = 0.9948$$

**Table S5.** Kinetic data for reaction of 2,4-dinitrophenyl 4-chlorobenzoate ( **1e** ) with 4-aminopyridine in 80 mol % H<sub>2</sub>O/20 mol % DMSO at 25.0 ± 0.1 °C.

| $10^4$ [4-aminopyridine] / M | $10^2 k_{\text{obsd}} / \text{s}^{-1}$ |
|------------------------------|----------------------------------------|
| 7.40                         | 4.12                                   |
| 14.7                         | 8.51                                   |
| 21.9                         | 13.5                                   |
| 29.1                         | 17.7                                   |
| 31.4                         | 18.8                                   |

$$k_{\text{OH}^-} = 62.0 \pm 1.36 \text{ M}^{-1}\text{s}^{-1}$$
$$R^2 = 0.9992$$

**Table S6.** Kinetic data for reaction of of 2,4-dinitrophenyl 3-chlorobenzoate ( **1f** ) with 4-aminopyridine in 80 mol % H<sub>2</sub>O/20 mol % DMSO at 25.0 ± 0.1 °C.

| $10^4$ [4-aminopyridine] / M | $10^2 k_{\text{obsd}} / \text{s}^{-1}$ |
|------------------------------|----------------------------------------|
| 3.60                         | 4.48                                   |
| 5.70                         | 7.66                                   |
| 7.10                         | 9.50                                   |
| 10.6                         | 15.0                                   |
| 14.1                         | 19.2                                   |

$$k_{\text{OH}^-} = 142 \pm 4.00 \text{ M}^{-1}\text{s}^{-1}$$
$$R^2 = 0.9988$$



**Table S7.** Kinetic data for reaction of of 2,4-dinitrophenyl 4-cyanobenzoate ( **1g** ) with 4-aminopyridine in 80 mol % H<sub>2</sub>O/20 mol % DMSO at 25.0 ± 0.1 °C.

| $10^4$ [4-aminopyridine] / M | $k_{\text{obsd}} / \text{s}^{-1}$ |
|------------------------------|-----------------------------------|
| 20.0                         | 0.61                              |
| 40.0                         | 1.22                              |
| 60.0                         | 1.90                              |
| 80.0                         | 2.52                              |
| 100                          | 3.17                              |

$$k_{\text{OH}^-} = 321 \pm 2.51 \text{ M}^{-1}\text{s}^{-1}$$
$$R^2 = 0.9998$$

**Table S8.** Kinetic data for reaction of of 2,4-dinitrophenyl 4-nitrobenzoate ( **1h** ) with 4-aminopyridine in 80 mol % H<sub>2</sub>O/20 mol % DMSO at 25.0 ± 0.1 °C.

| $10^3$ [4-aminopyridine] / M | $k_{\text{obsd}} / \text{s}^{-1}$ |
|------------------------------|-----------------------------------|
| 1.97                         | 0.83                              |
| 3.93                         | 1.70                              |
| 5.90                         | 2.56                              |
| 7.86                         | 3.47                              |
| 9.83                         | 4.32                              |

$$k_{\text{OH}^-} = 446 \pm 3.00 \text{ M}^{-1}\text{s}^{-1}$$
$$R^2 = 0.9999$$

**Table S9.** Kinetic data for reaction of of 2,4-dinitrophenyl 4-chloro,3-nitrobenzoate ( **1i** ) with 4-aminopyridine in 80 mol % H<sub>2</sub>O/20 mol % DMSO at 25.0 ± 0.1 °C.

| $10^3$ [4-aminopyridine] / M | $k_{\text{obsd}} / \text{s}^{-1}$ |
|------------------------------|-----------------------------------|
| 1.97                         | 1.07                              |
| 3.93                         | 2.16                              |
| 5.90                         | 3.12                              |
| 7.86                         | 4.17                              |
| 9.83                         | 5.17                              |

$$k_{\text{OH}^-} = 520 \pm 5.00 \text{ M}^{-1}\text{s}^{-1}$$
$$R^2 = 0.9998$$

**Table S10.** Kinetic data for reaction of of 2,4-dinitrophenyl 3,5-dinitrobenzoate ( **1j** ) with 4-aminopyridine in 80 mol % H<sub>2</sub>O/20 mol % DMSO at 25.0 ± 0.1 °C.

| $10^3$ [4-aminopyridine] / M | $k_{\text{obsd}} / \text{s}^{-1}$ |
|------------------------------|-----------------------------------|
| 1.97                         | 4.06                              |
| 3.93                         | 8.51                              |
| 5.90                         | 13.1                              |
| 7.86                         | 17.6                              |
| 9.83                         | 22.5                              |

$$k_{\text{OH}^-} = 2340 \pm 20.0 \text{ M}^{-1}\text{s}^{-1}$$
$$R^2 = 0.9998$$

**Table S11.** Kinetic data for reaction of of 2,4-dinitrophenyl 4-dimethylaminobenzoate ( **1a** ) with 3,4-dimethylpyridine in 80 mol % H<sub>2</sub>O/20 mol % DMSO at 25.0 ± 0.1 °C.

| $10^3$ [3,4-dimethylpyridine] / M | $10^4 k_{\text{obsd}} / \text{s}^{-1}$ |
|-----------------------------------|----------------------------------------|
| 43.4                              | 1.00                                   |
| 58.9                              | 1.37                                   |
| 71.7                              | 1.67                                   |
| 91.6                              | 2.13                                   |
| 103                               | 2.34                                   |

$$k_{\text{OH}^-} = 0.00227 \pm 0.00005 \text{ M}^{-1}\text{s}^{-1}$$
$$R^2 = 0.9993$$

**Table S12.** Kinetic data for reaction of of 2,4-dinitrophenyl 4-methoxybenzoate ( **1b** ) with 3,4-dimethylpyridine in 80 mol % H<sub>2</sub>O/20 mol % DMSO at 25.0 ± 0.1 °C.

| $10^2$ [3,4-dimethylpyridine] / M | $10^3 k_{\text{obsd}} / \text{s}^{-1}$ |
|-----------------------------------|----------------------------------------|
| 8.58                              | 1.65                                   |
| 10.3                              | 1.92                                   |
| 12.0                              | 2.22                                   |
| 15.4                              | 2.87                                   |
| 18.9                              | 3.45                                   |

$$k_{\text{OH}^-} = 0.0177 \pm 0.0003 \text{ M}^{-1}\text{s}^{-1}$$
$$R^2 = 0.9995$$

**Table S13.** Kinetic data for reaction of of 2,4-dinitrophenyl 4-methylbenzoate ( **1c** ) with 3,4-dimethylpyridine in 80 mol % H<sub>2</sub>O/20 mol % DMSO at 25.0 ± 0.1 °C.

| $10^3$ [3,4-dimethylpyridine] / M | $10^3 k_{\text{obsd}} / \text{s}^{-1}$ |
|-----------------------------------|----------------------------------------|
| 43.4                              | 2.28                                   |
| 58.9                              | 2.96                                   |
| 71.7                              | 3.59                                   |
| 82.4                              | 4.08                                   |
| 103                               | 4.96                                   |

$$k_{\text{OH}^-} = 0.0453 \pm 0.0007 \text{ M}^{-1} \text{ s}^{-1}$$
$$R^2 = 0.9996$$

**Table S14.** Kinetic data for reaction of of 2,4-dinitrophenyl benzoate ( **1d** ) with 3,4-dimethylpyridine in 80 mol % H<sub>2</sub>O/20 mol % DMSO at 25.0 ± 0.1 °C.

| $10^2$ [3,4-dimethylpyridine] / M | $10^3 k_{\text{obsd}} / \text{s}^{-1}$ |
|-----------------------------------|----------------------------------------|
| 9.20                              | 8.31                                   |
| 11.7                              | 10.3                                   |
| 15.1                              | 12.6                                   |
| 17.7                              | 14.6                                   |
| 21.0                              | 16.9                                   |

$$k_{\text{OH}^-} = 0.0725 \pm 0.0009 \text{ M}^{-1} \text{ s}^{-1}$$
$$R^2 = 0.9997$$

**Table S15.** Kinetic data for reaction of of 2,4-dinitrophenyl 4-chlorobenzoate ( **1e** ) with 3,4-dimethylpyridine in 80 mol % H<sub>2</sub>O/20 mol % DMSO at 25.0 ± 0.1 °C.

| $10^3$ [3,4-dimethylpyridine] / M | $10^3 k_{\text{obsd}} / \text{s}^{-1}$ |
|-----------------------------------|----------------------------------------|
| 43.6                              | 5.94                                   |
| 72.0                              | 9.65                                   |
| 82.8                              | 10.8                                   |
| 104                               | 13.4                                   |
| 124                               | 16.0                                   |

$$k_{\text{OH}^-} = 0.124 \pm 0.002 \text{ M}^{-1} \text{ s}^{-1}$$
$$R^2 = 0.9997$$

**Table S16.** Kinetic data for reaction of of 2,4-dinitrophenyl 3-chlorobenzoate ( **1f** ) with 3,4-dimethylpyridine in 80 mol % H<sub>2</sub>O/20 mol % DMSO at 25.0 ± 0.1 °C.

| $10^3$ [3,4-dimethylpyridine] / M | $10^3 k_{\text{obsd}} / \text{s}^{-1}$ |
|-----------------------------------|----------------------------------------|
| 18.7                              | 4.98                                   |
| 34.3                              | 8.65                                   |
| 47.5                              | 12.2                                   |
| 58.9                              | 15.4                                   |
| 68.7                              | 17.9                                   |

$$k_{\text{OH}^-} = 0.261 \pm 0.005 \text{ M}^{-1}\text{s}^{-1}$$
$$R^2 = 0.9994$$

**Table S17.** Kinetic data for reaction of of 2,4-dinitrophenyl 4-cyanobenzoate ( **1g** ) with 3,4-dimethylpyridine in 80 mol % H<sub>2</sub>O/20 mol % DMSO at 25.0 ± 0.1 °C.

| $10^3$ [3,4-dimethylpyridine] / M | $10^2 k_{\text{obsd}} / \text{s}^{-1}$ |
|-----------------------------------|----------------------------------------|
| 19.0                              | 1.04                                   |
| 34.9                              | 1.95                                   |
| 48.3                              | 2.64                                   |
| 59.8                              | 3.25                                   |
| 69.8                              | 3.74                                   |

$$k_{\text{OH}^-} = 0.531 \pm 0.008 \text{ M}^{-1}\text{s}^{-1}$$
$$R^2 = 0.9996$$

**Table S18.** Kinetic data for reaction of of 2,4-dinitrophenyl 4-nitrobenzoate ( **1h** ) with 3,4-dimethylpyridine in 80 mol % H<sub>2</sub>O/20 mol % DMSO at 25.0 ± 0.1 °C.

| $10^3$ [3,4-dimethylpyridine] / M | $10^3 k_{\text{obsd}} / \text{s}^{-1}$ |
|-----------------------------------|----------------------------------------|
| 9.81                              | 7.33                                   |
| 18.7                              | 13.6                                   |
| 26.9                              | 19.1                                   |
| 34.3                              | 24.8                                   |
| 41.2                              | 29.7                                   |

$$k_{\text{OH}^-} = 0.713 \pm 0.008 \text{ M}^{-1}\text{s}^{-1}$$
$$R^2 = 0.9997$$

**Table S19.** Kinetic data for reaction of of 2,4-dinitrophenyl 4-chloro,3-nitrobenzoate ( **1i** ) with 3,4-dimethylpyridine in 80 mol % H<sub>2</sub>O/20 mol % DMSO at 25.0 ± 0.1 °C.

| $10^3$ [3,4-dimethylpyridine] / M | $10^2 k_{\text{obsd}} / \text{s}^{-1}$ |
|-----------------------------------|----------------------------------------|
| 19.0                              | 1.40                                   |
| 34.9                              | 2.64                                   |
| 48.3                              | 3.65                                   |
| 59.8                              | 4.44                                   |
| 69.8                              | 5.19                                   |

$$k_{\text{OH}^-} = 0.743 \pm 0.008 \text{ M}^{-1}\text{s}^{-1}$$
$$R^2 = 0.9997$$

**Table S20.** Kinetic data for reaction of of 2,4-dinitrophenyl 3,5-dinitrobenzoate ( **1j** ) with 3,4-dimethylpyridine in 80 mol % H<sub>2</sub>O/20 mol % DMSO at 25.0 ± 0.1 °C.

| $10^3$ [3,4-dimethylpyridine] / M | $10^2 k_{\text{obsd}} / \text{s}^{-1}$ |
|-----------------------------------|----------------------------------------|
| 8.05                              | 1.85                                   |
| 15.5                              | 3.61                                   |
| 19.0                              | 4.42                                   |
| 22.4                              | 5.14                                   |
| 25.7                              | 5.87                                   |

$$k_{\text{OH}^-} = 2.28 \pm 0.03 \text{ M}^{-1}\text{s}^{-1}$$
$$R^2 = 0.9997$$

**Table S21.** Kinetic data for reaction of of 2,4-dinitrophenyl 4-dimethylaminobenzoate ( **1a** ) with pyridine in 80 mol % H<sub>2</sub>O/20 mol % DMSO at 25.0 ± 0.1 °C.

| $10^2$ [pyridine] / M | $10^5 k_{\text{obsd}} / \text{s}^{-1}$ |
|-----------------------|----------------------------------------|
| 11.3                  | 3.96                                   |
| 12.9                  | 4.53                                   |
| 14.5                  | 5.06                                   |
| 16.1                  | 5.63                                   |
| 17.1                  | 5.98                                   |

$$k_{\text{OH}^-} = (3.47 \pm 0.02) \times 10^{-4} \text{ M}^{-1}\text{s}^{-1}$$
$$R^2 = 0.9999$$

**Table S22.** Kinetic data for reaction of of 2,4-dinitrophenyl 4-methoxybenzoate ( **1b** ) with pyridine in 80 mol % H<sub>2</sub>O/20 mol % DMSO at 25.0 ± 0.1 °C.

| $10^2$ [pyridine] / M | $10^4 k_{\text{obsd}} / \text{s}^{-1}$ |
|-----------------------|----------------------------------------|
| 11.3                  | 2.20                                   |
| 12.9                  | 2.51                                   |
| 14.5                  | 2.85                                   |
| 16.1                  | 3.32                                   |
| 17.1                  | 3.50                                   |

$$k_{\text{OH}^-} = 0.00231 \pm 0.0001 \text{ M}^{-1}\text{s}^{-1}$$
$$R^2 = 0.9970$$

**Table S23.** Kinetic data for reaction of of 2,4-dinitrophenyl 4-methylbenzoate ( **1c** ) with pyridine in 80 mol % H<sub>2</sub>O/20 mol % DMSO at 25.0 ± 0.1 °C.

| $10^2$ [pyridine] / M | $10^4 k_{\text{obsd}} / \text{s}^{-1}$ |
|-----------------------|----------------------------------------|
| 9.67                  | 4.84                                   |
| 11.3                  | 5.67                                   |
| 12.9                  | 6.46                                   |
| 14.5                  | 7.18                                   |
| 16.1                  | 8.07                                   |

$$k_{\text{OH}^-} = 0.00496 \pm 0.00008 \text{ M}^{-1}\text{s}^{-1}$$
$$R^2 = 0.9995$$

**Table S24.** Kinetic data for reaction of of 2,4-dinitrophenyl benzoate ( **1d** ) with pyridine in 80 mol % H<sub>2</sub>O/20 mol % DMSO at 25.0 ± 0.1 °C.

| $10^2$ [pyridine] / M | $10^4 k_{\text{obsd}} / \text{s}^{-1}$ |
|-----------------------|----------------------------------------|
| 9.82                  | 9.15                                   |
| 13.1                  | 11.9                                   |
| 14.7                  | 13.2                                   |
| 16.4                  | 14.8                                   |
| 17.3                  | 15.6                                   |

$$k_{\text{OH}^-} = 0.00861 \pm 0.00001 \text{ M}^{-1}\text{s}^{-1}$$
$$R^2 = 0.9996$$

**Table S25.** Kinetic data for reaction of of 2,4-dinitrophenyl 4-chlorobenzoate ( **1e** ) with pyridine in 80 mol % H<sub>2</sub>O/20 mol % DMSO at 25.0 ± 0.1 °C.

| $10^2$ [pyridine] / M | $10^3 k_{\text{obsd}} / \text{s}^{-1}$ |
|-----------------------|----------------------------------------|
| 11.3                  | 1.49                                   |
| 12.9                  | 1.68                                   |
| 14.5                  | 1.85                                   |
| 16.1                  | 2.04                                   |
| 17.0                  | 2.14                                   |

$$k_{\text{OH}^-} = 0.0114 \pm 0.0001 \text{ M}^{-1}\text{s}^{-1}$$
$$R^2 = 0.9998$$

**Table S26.** Kinetic data for reaction of of 2,4-dinitrophenyl 3-chlorobenzoate ( **1f** ) with pyridine in 80 mol % H<sub>2</sub>O/20 mol % DMSO at 25.0 ± 0.1 °C.

| $10^3$ [pyridine] / M | $10^3 k_{\text{obsd}} / \text{s}^{-1}$ |
|-----------------------|----------------------------------------|
| 47.6                  | 1.08                                   |
| 75.4                  | 1.75                                   |
| 109                   | 2.58                                   |
| 151                   | 3.62                                   |
| 177                   | 4.27                                   |

$$k_{\text{OH}^-} = 0.0248 \pm 0.00004 \text{ M}^{-1}\text{s}^{-1}$$
$$R^2 = 0.9999$$

**Table S27.** Kinetic data for reaction of of 2,4-dinitrophenyl 4-cyanobenzoate ( **1g** ) with pyridine in 80 mol % H<sub>2</sub>O/20 mol % DMSO at 25.0 ± 0.1 °C.

| $10^3$ [pyridine] / M | $10^3 k_{\text{obsd}} / \text{s}^{-1}$ |
|-----------------------|----------------------------------------|
| 65.4                  | 3.28                                   |
| 73.6                  | 3.65                                   |
| 83.3                  | 4.15                                   |
| 89.9                  | 4.43                                   |
| 105                   | 5.20                                   |

$$k_{\text{OH}^-} = 0.0485 \pm 0.0007 \text{ M}^{-1}\text{s}^{-1}$$
$$R^2 = 0.9996$$

**Table S28.** Kinetic data for reaction of of 2,4-dinitrophenyl 4-nitrobenzoate ( **1h** ) with pyridine in 80 mol % H<sub>2</sub>O/20 mol % DMSO at 25.0 ± 0.1 °C.

| $10^2$ [pyridine] / M | $10^3 k_{\text{obsd}} / \text{s}^{-1}$ |
|-----------------------|----------------------------------------|
| 6.46                  | 3.67                                   |
| 7.36                  | 4.24                                   |
| 8.33                  | 4.79                                   |
| 8.99                  | 5.36                                   |
| 10.6                  | 6.23                                   |

$$k_{\text{OH}^-} = 0.0614 \pm 0.004 \text{ M}^{-1}\text{s}^{-1}$$
$$R^2 = 0.9962$$

**Table S29.** Kinetic data for reaction of of 2,4-dinitrophenyl 4-chloro,3-nitrobenzoate ( **1i** ) with pyridine in 80 mol % H<sub>2</sub>O/20 mol % DMSO at 25.0 ± 0.1 °C.

| $10^2$ [pyridine] / M | $10^3 k_{\text{obsd}} / \text{s}^{-1}$ |
|-----------------------|----------------------------------------|
| 6.70                  | 3.89                                   |
| 8.52                  | 4.81                                   |
| 10.9                  | 6.10                                   |
| 13.4                  | 7.56                                   |
| 15.1                  | 8.37                                   |
| 16.7                  | 9.43                                   |
| 17.7                  | 9.79                                   |
| 19.2                  | 10.5                                   |
| 20.9                  | 11.4                                   |

$$k_{\text{OH}^-} = 0.0534 \pm 0.0007 \text{ M}^{-1}\text{s}^{-1}$$
$$R^2 = 0.9993$$

**Table S30.** Kinetic data for reaction of of 2,4-dinitrophenyl 3,5-dinitrobenzoate ( **1j** ) with pyridine in 80 mol % H<sub>2</sub>O/20 mol % DMSO at 25.0 ± 0.1 °C.

| $10^3$ [pyridine] / M | $10^3 k_{\text{obsd}} / \text{s}^{-1}$ |
|-----------------------|----------------------------------------|
| 56.4                  | 8.96                                   |
| 65.4                  | 10.2                                   |
| 73.6                  | 11.6                                   |
| 83.3                  | 13.1                                   |
| 89.9                  | 14.5                                   |

$$k_{\text{OH}^-} = 0.164 \pm 0.006 \text{ M}^{-1}\text{s}^{-1}$$
$$R^2 = 0.9979$$
